# Supplementary material for: Genome-wide insertion–deletion (InDel) marker discovery and genotyping for genomics-assisted breeding applications in chickpea
Source: PubMed Central journal article supplement — DNA Res. 2015 Sep 17;22(5):377–86. doi: 10.1093/dnares/dsv020 (PMC4596403; doi:10.1093/dnares/dsv020), 2015-09-17
Supplement: supp_dsv020_dsv020supp_fig1.pdf [file supp_dsv020_dsv020supp_fig1.pdf]

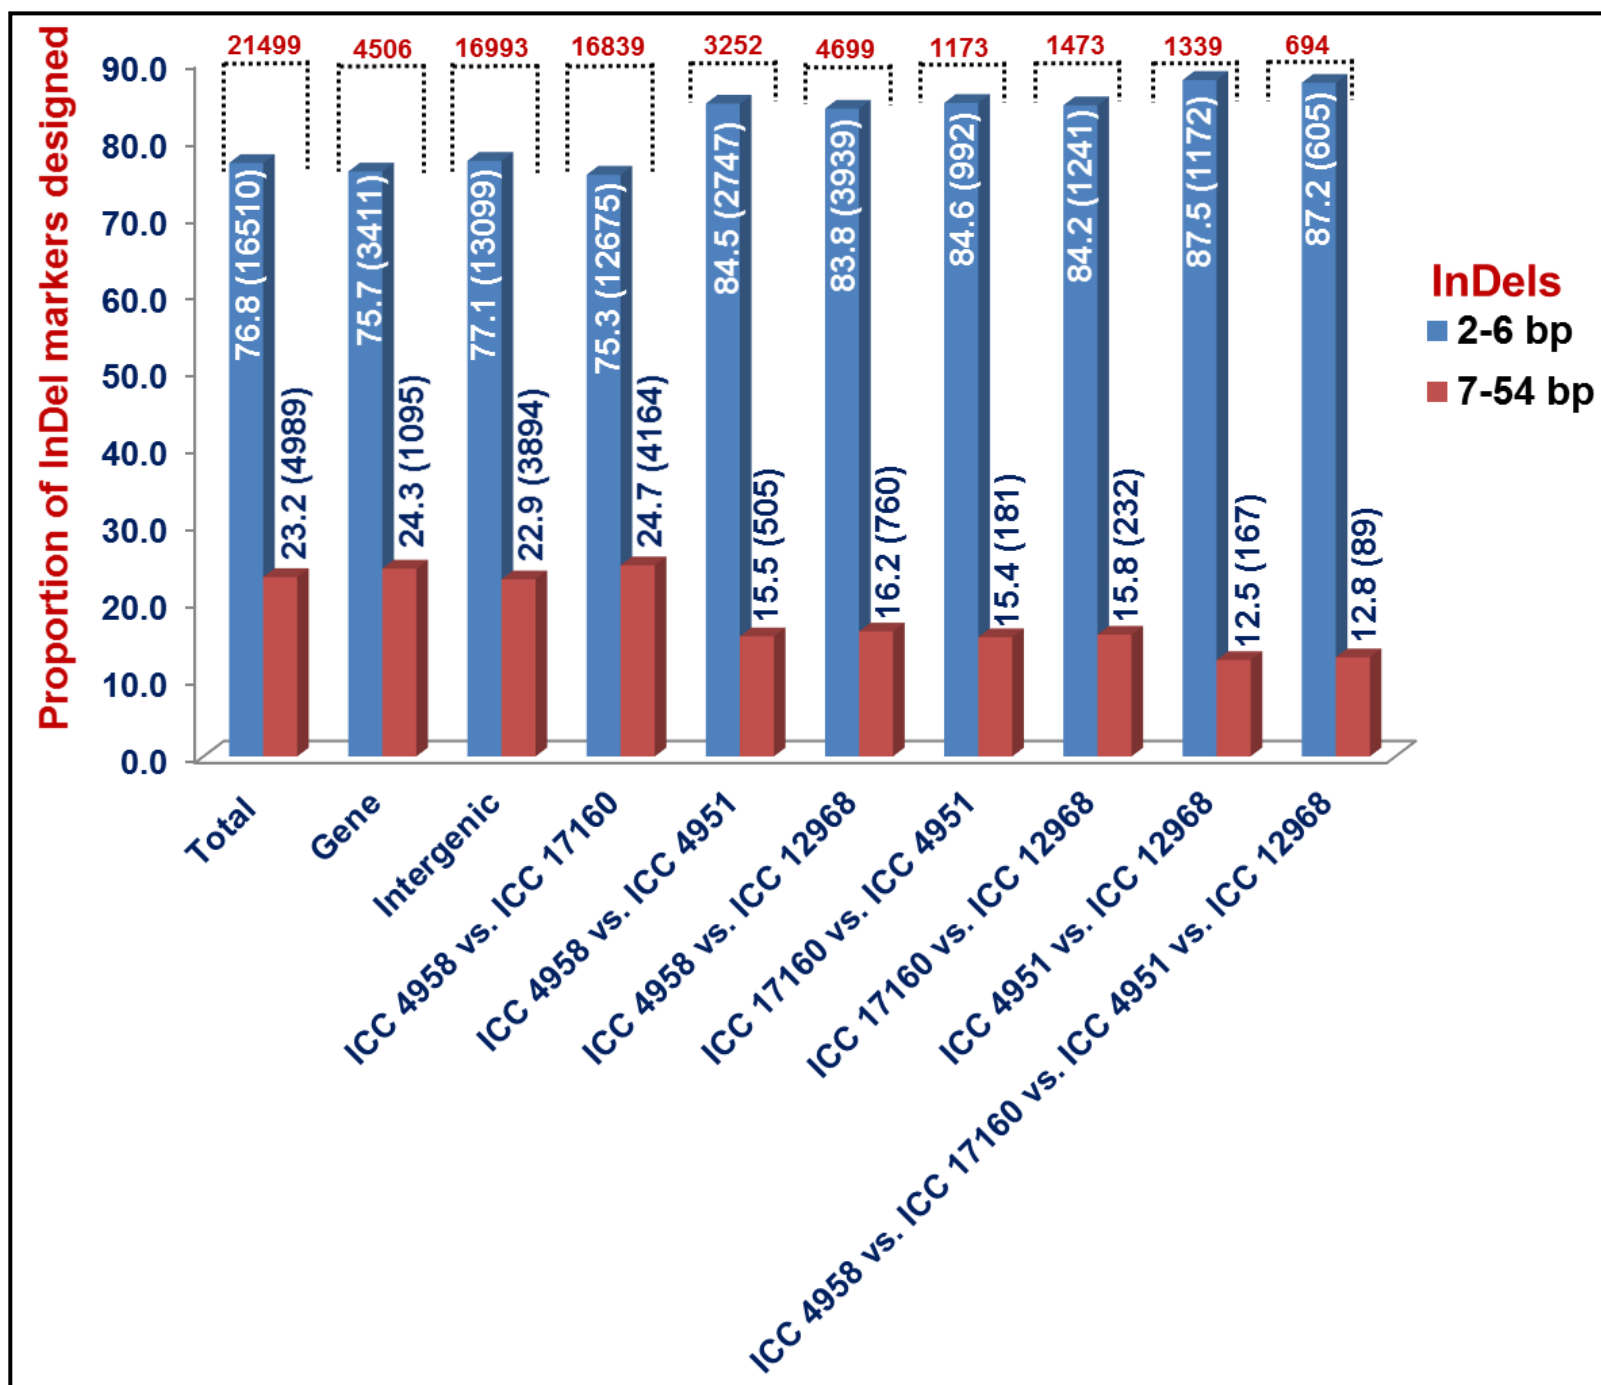

**Figure S1:** Proportionate (%) distribution of 21499 InDel markers (derived from diverse intergenic and gene regions of *desi* chickpea genome) showing 2 to 6 and 7 to 54-bp *in silico* fragment length polymorphism among different possible-pair combination of four chickpea accessions (ICC 4958, ICC 4951, ICC 12968 and ICC 17160). The abundance of InDel markers showing 2 to 6-bp fragment length polymorphism in all possible-pair combination of accessions was evident.
