# Supplementary material for: Genome-wide insertion–deletion (InDel) marker discovery and genotyping for genomics-assisted breeding applications in chickpea
Source: PubMed Central journal article supplement — DNA Res. 2015 Sep 17;22(5):377–86. doi: 10.1093/dnares/dsv020 (PMC4596403; doi:10.1093/dnares/dsv020), 2015-09-17
Supplement: supp_dsv020_dsv020supp_fig3.pdf [file supp_dsv020_dsv020supp_fig3.pdf]

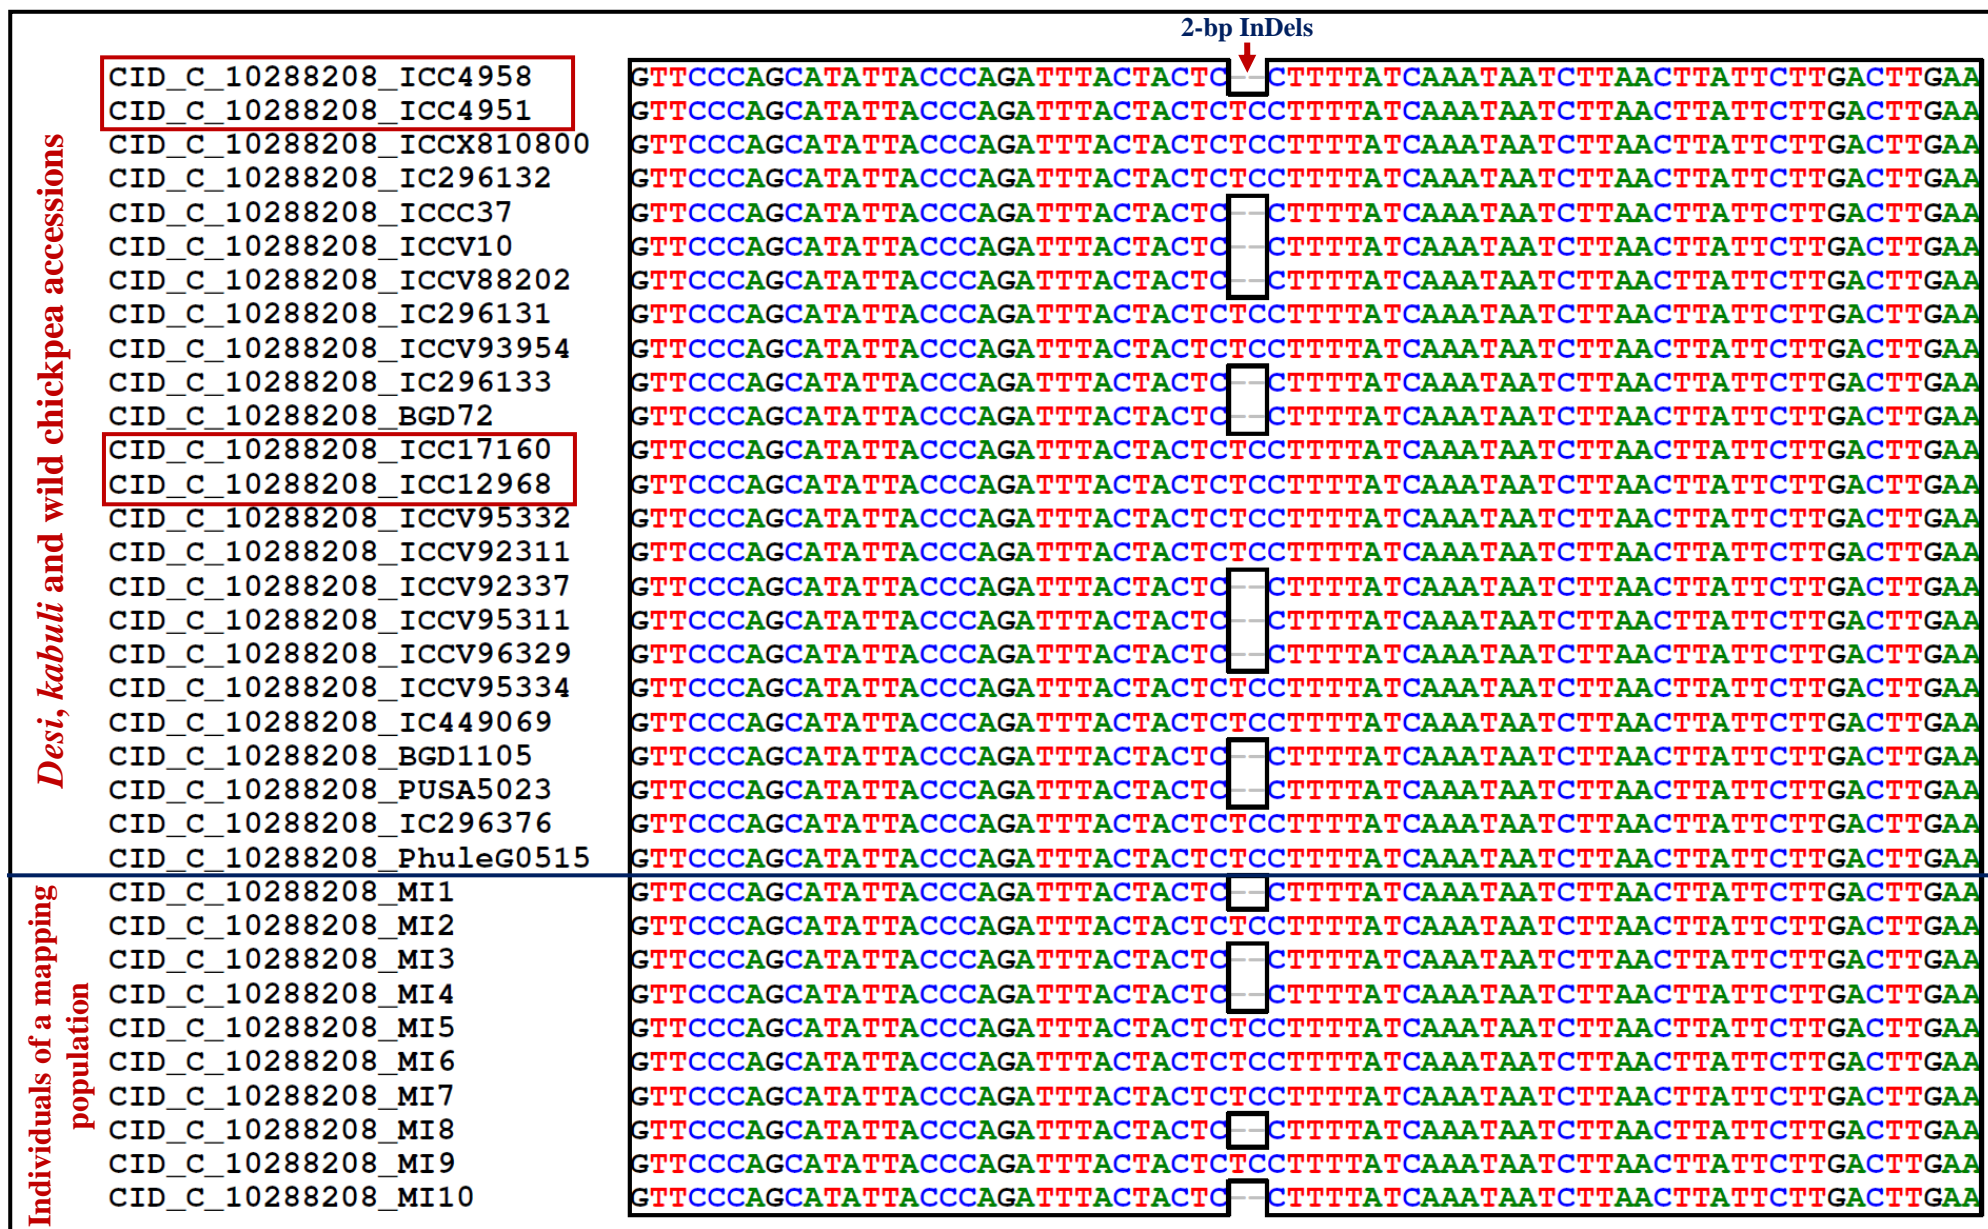

**Figure S3:** Multiple sequence alignment of resequenced PCR amplicons generated from a representative set of 24 chickpea accessions and 10 individuals of a mapping population (ICC 4958 x ICC 17160) using a selected InDel marker (CID\_C\_10288208)-carrying *histone deacetylase* gene. This validated the presence of expected InDels, which corresponded well with our *in silico* prediction of 2-bp fragment length polymorphism commonly detected among four chickpea accessions (ICC 4958, ICC 4951, ICC 12968 and ICC 17160). The efficiency of InDel marker for large-scale validation and genotyping in a diverse set of *desi*, *kabuli* and wild chickpea accessions and individuals of a mapping population based on amplicons resequencing was apparent. The detailed information regarding InDel marker is mentioned in the Table S3.
