# Supplementary material for: Genome-wide insertion–deletion (InDel) marker discovery and genotyping for genomics-assisted breeding applications in chickpea
Source: PubMed Central journal article supplement — DNA Res. 2015 Sep 17;22(5):377–86. doi: 10.1093/dnares/dsv020 (PMC4596403; doi:10.1093/dnares/dsv020), 2015-09-17
Supplement: supp_dsv020_dsv020supp_fig4.pdf [file supp_dsv020_dsv020supp_fig4.pdf]

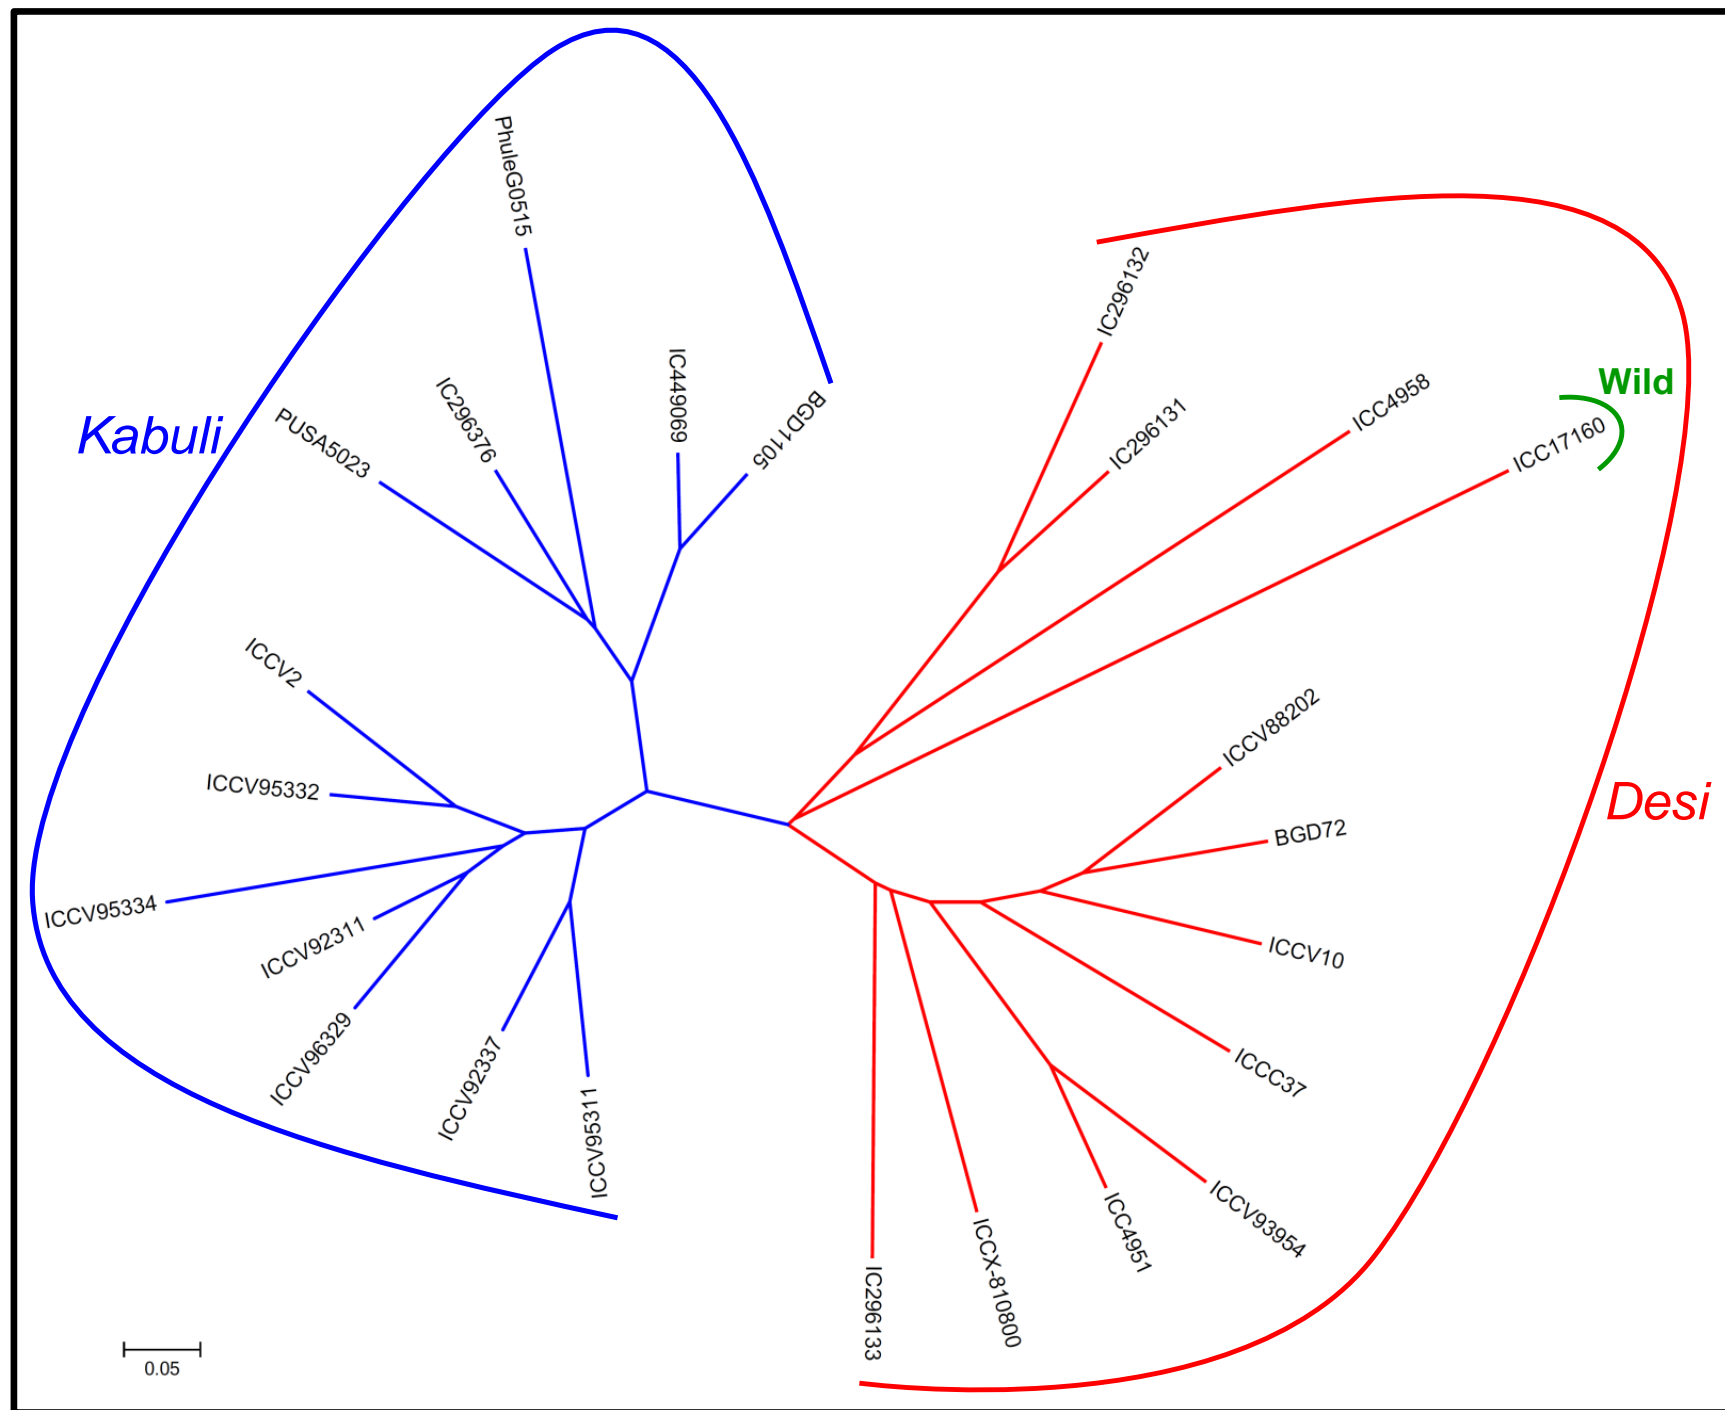

**Figure S4:** Unrooted phylogenetic tree illustrating the molecular diversity and genetic relationships among 24 cultivated (*desi* and *kabuli*) and wild chickpea accessions based on Nei's genetic distance coefficient using 6254 genome/gene-derived informative InDel markers. The molecular clustering pattern differentiated all these accessions into two major *desi* and *kabuli* groups as expected according to their known cultivar-specific origination and pedigree relationships. One wild *C. reticulatum* accession (ICC 17160) clustered distinctly within a *desi* cultivar group.
