# Supplementary material for: Genome-wide insertion–deletion (InDel) marker discovery and genotyping for genomics-assisted breeding applications in chickpea
Source: PubMed Central journal article supplement — DNA Res. 2015 Sep 17;22(5):377–86. doi: 10.1093/dnares/dsv020 (PMC4596403; doi:10.1093/dnares/dsv020), 2015-09-17
Supplement: supp_dsv020_dsv020supp_fig5.pdf [file supp_dsv020_dsv020supp_fig5.pdf]

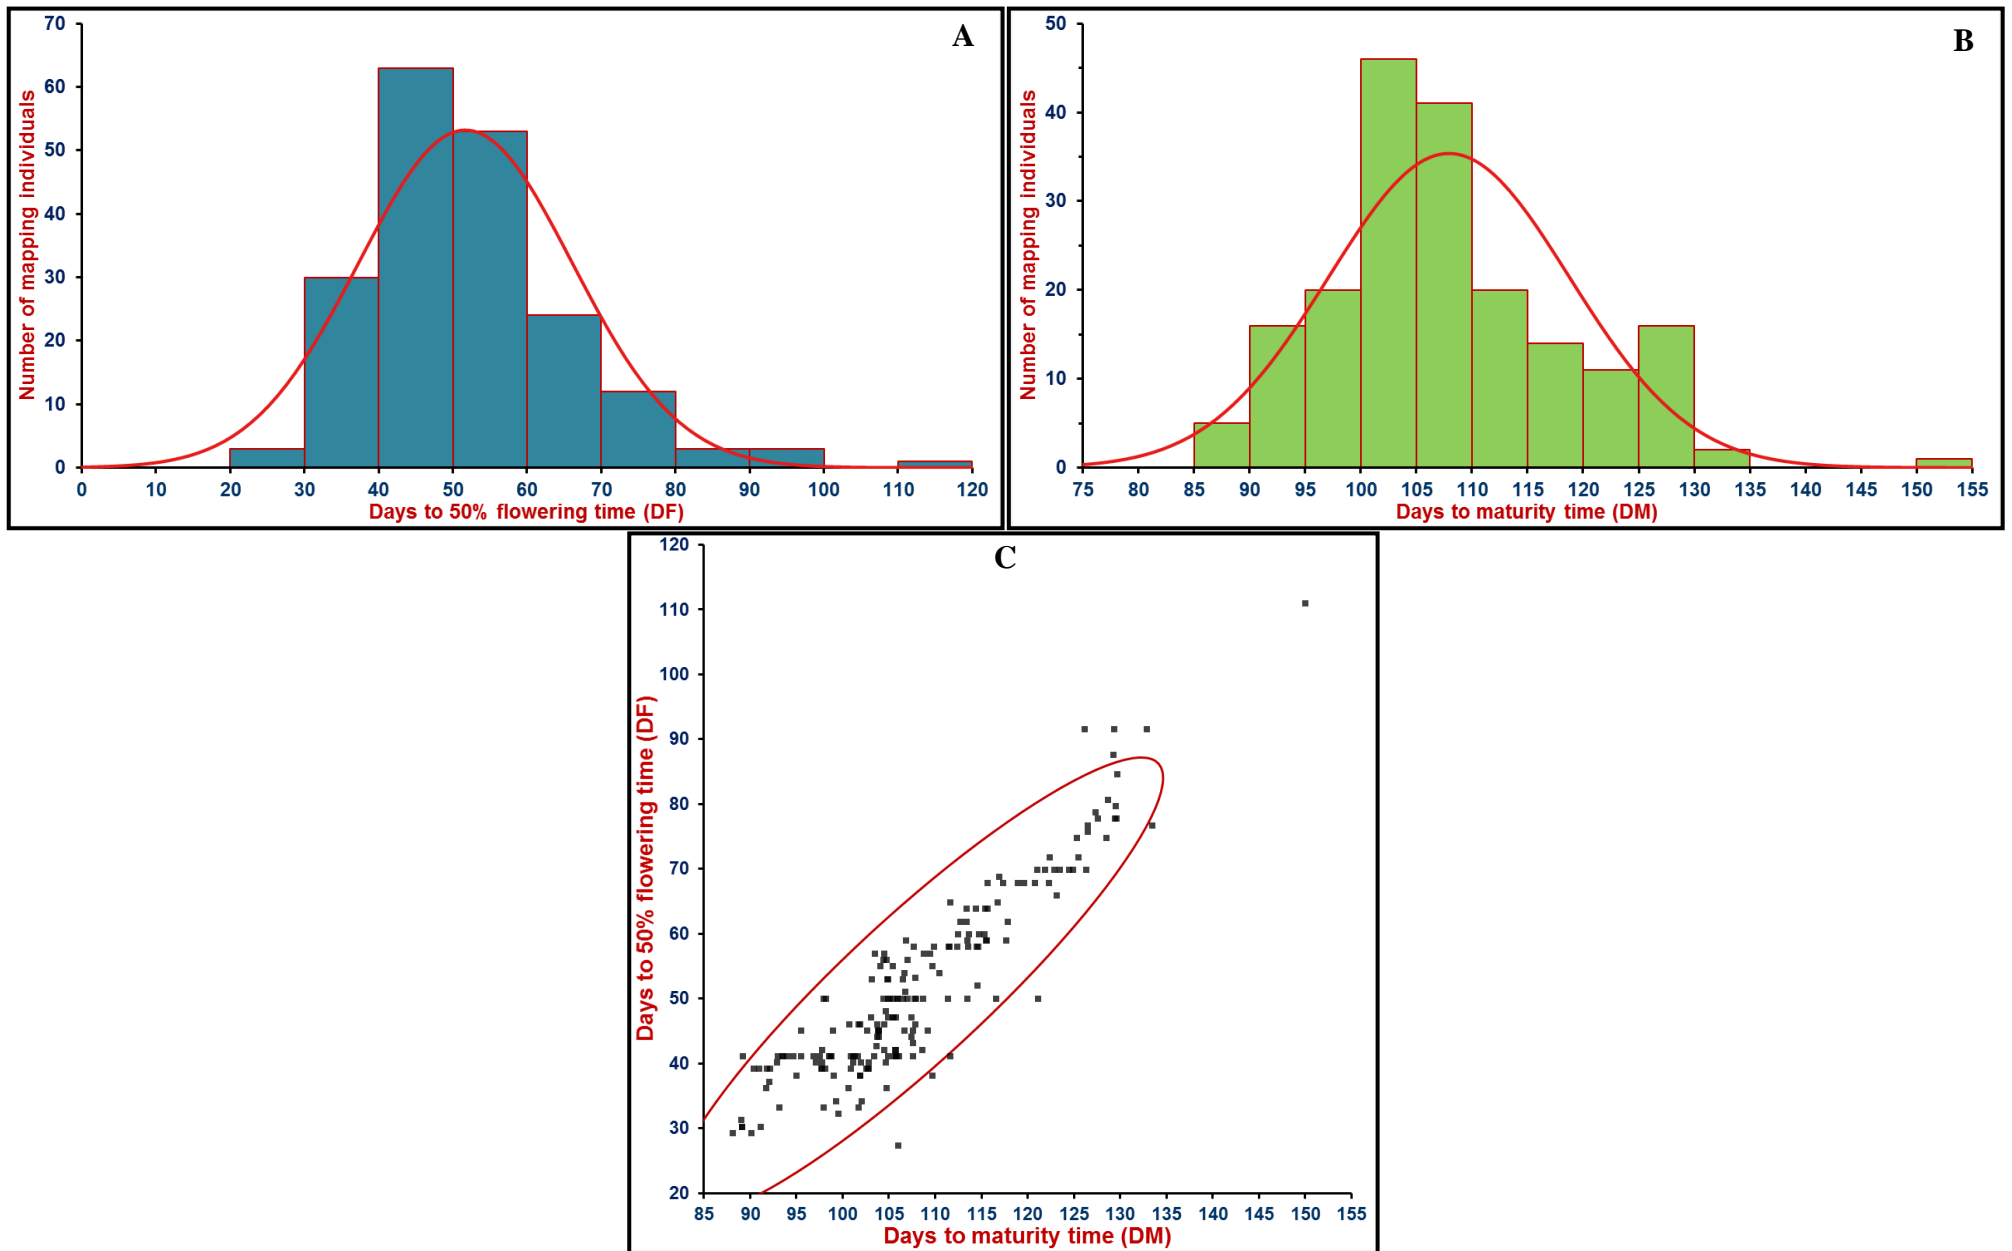

**Figure S5:** Frequency distribution of DF (A) and DM (B) quantitative traits in 190 F<sub>5</sub> mapping individuals (ICC 4958 x ICC 17160) and parental accessions, illustrated a goodness of fit to the normal distribution. Correlation based on Pearson's correlation coefficients measured between DF and DM traits in a mapping population (C).
