# Supplementary material for: Genome-wide insertion–deletion (InDel) marker discovery and genotyping for genomics-assisted breeding applications in chickpea
Source: PubMed Central journal article supplement — DNA Res. 2015 Sep 17;22(5):377–86. doi: 10.1093/dnares/dsv020 (PMC4596403; doi:10.1093/dnares/dsv020), 2015-09-17
Supplement: supp_dsv020_dsv020supp_table1.pdf [file supp_dsv020_dsv020supp_table1.pdf]

**Table S1:** Chickpea accessions used for large-scale validation and genotyping of InDel markers

| <b>S.N.</b> | <b>Accession Numbers</b> | <b>Cultivar types</b> | <b>Geographical origin</b> | <b>Biological status</b>                    |
|-------------|--------------------------|-----------------------|----------------------------|---------------------------------------------|
| 1           | ICC4958                  | <i>Desi</i>           | Central India              | Traditional cultivar/Landrace/genetic stock |
| 2           | ICC4951                  | <i>Desi</i>           | Central India              | Landrace                                    |
| 3           | ICCX-810800              | <i>Desi</i>           | Northern India             | Variety                                     |
| 4           | IC296132                 | <i>Desi</i>           | Northern India             | Variety                                     |
| 5           | ICCC37                   | <i>Desi</i>           | Southern India             | Variety                                     |
| 6           | ICCV10                   | <i>Desi</i>           | India                      | Released Cultivar                           |
| 7           | ICCV88202                | <i>Desi</i>           | Northern India             | Variety                                     |
| 8           | IC296131                 | <i>Desi</i>           | Northern India             | Variety                                     |
| 9           | ICCV93954                | <i>Desi</i>           | Southern India             | Variety                                     |
| 10          | IC296133                 | <i>Desi</i>           | Northern India             | Variety                                     |
| 11          | BGD72                    | <i>Desi</i>           | Northern India             | Genetic stock                               |
| 12          | ICC17160                 | Wild                  | Turkey                     | Wild species                                |
| 13          | ICC12968                 | <i>Kabuli</i>         | Southern India             | Variety                                     |
| 14          | ICCV95332                | <i>Kabuli</i>         | Central India              | Variety                                     |
| 15          | ICCV92311                | <i>Kabuli</i>         | India                      | Released Cultivar/Variety                   |
| 16          | ICCV92337                | <i>Kabuli</i>         | Central India              | Variety                                     |
| 17          | ICCV95311                | <i>Kabuli</i>         | Southern India             | Variety                                     |
| 18          | ICCV96329                | <i>Kabuli</i>         | Southern India             | Variety                                     |
| 19          | ICCV95334                | <i>Kabuli</i>         | Central India              | Variety                                     |
| 20          | IC449069                 | <i>Kabuli</i>         | Northern India             | Variety                                     |
| 21          | BGD1105                  | <i>Kabuli</i>         | Northern India             | Genetic stock                               |
| 22          | PUSA5023                 | <i>Kabuli</i>         | Northern India             | Variety                                     |
| 23          | IC296376                 | <i>Kabuli</i>         | Northern India             | Variety                                     |
| 24          | PhuleG0515               | <i>Kabuli</i>         | Central India              | Variety                                     |
