# Supplementary material for: Genome-wide insertion–deletion (InDel) marker discovery and genotyping for genomics-assisted breeding applications in chickpea
Source: PubMed Central journal article supplement — DNA Res. 2015 Sep 17;22(5):377–86. doi: 10.1093/dnares/dsv020 (PMC4596403; doi:10.1093/dnares/dsv020), 2015-09-17
Supplement: supp_dsv020_dsv020supp_table2.pdf [file supp_dsv020_dsv020supp_table2.pdf]

**Table S2:** Genomic distribution of InDel markers physically mapped on eight chromosomes and unanchored scaffolds of *desi* chickpea genome

| <b>Chromosomes</b>   | <b>Size (Mb) of <i>desi</i> chromosomes (pseudomolecules)</b> | <b>Number (%) of InDel markers mapped</b> | <b>Average map density (kb)</b> |
|----------------------|---------------------------------------------------------------|-------------------------------------------|---------------------------------|
| Ca_Chr01             | 14.79                                                         | 933 (12.2)                                | 15.9                            |
| Ca_Chr02             | 17.30                                                         | 1056 (13.8)                               | 16.4                            |
| Ca_Chr03             | 23.38                                                         | 1468 (19.2)                               | 15.9                            |
| Ca_Chr04             | 22.09                                                         | 1374 (18.0)                               | 16.1                            |
| Ca_Chr05             | 16.30                                                         | 1015 (13.3)                               | 16.1                            |
| Ca_Chr06             | 11.48                                                         | 746 (9.8)                                 | 15.4                            |
| Ca_Chr07             | 8.46                                                          | 488 (6.4)                                 | 17.3                            |
| Ca_Chr08             | 10.57                                                         | 563 (7.4)                                 | 18.8                            |
| <b>Total</b>         | <b>124.37</b>                                                 | <b>7643 (35.6)</b>                        | <b>16.3</b>                     |
| Unanchored scaffolds | NA                                                            | 13856 (64.4)                              | NA                              |
| <b>Total</b>         | <b>NA</b>                                                     | <b>21499</b>                              | <b>NA</b>                       |
