# Supplementary material for: Genome-wide insertion–deletion (InDel) marker discovery and genotyping for genomics-assisted breeding applications in chickpea
Source: PubMed Central journal article supplement — DNA Res. 2015 Sep 17;22(5):377–86. doi: 10.1093/dnares/dsv020 (PMC4596403; doi:10.1093/dnares/dsv020), 2015-09-17
Supplement: supp_dsv020_dsv020supp_table4.pdf [file supp_dsv020_dsv020supp_table4.pdf]

**Table S4:** Diverse statistical measures-based phenotypic variation of DF and DM traits observed in an inter-specific chickpea mapping population (ICC 4958 x ICC 17160)

| Traits                      | Years | Parental accessions  |                       | F <sub>5</sub> mapping individuals |            | Heritability (H <sup>2</sup> %) | Coefficient of variation (CV) | ANOVA significance (P) |
|-----------------------------|-------|----------------------|-----------------------|------------------------------------|------------|---------------------------------|-------------------------------|------------------------|
|                             |       | ICC 4958 (Mean ± SD) | ICC 17160 (Mean ± SD) | (Mean ± SD)                        | Range      |                                 |                               |                        |
| Days to flowering time (DF) | 2012  | 42.7 ± 1.8           | 111.0 ± 2.6           | 51.7 ± 14.4                        | 27.3-111.0 | 81                              | 27.8                          | < 0.0001               |
|                             | 2013  | 43.5 ± 2.0           | 112.3 ± 2.1           | 50.4 ± 12.5                        | 25.7-109.8 | 80                              | 24.8                          | < 0.001                |
| Days to maturity time (DM)  | 2012  | 103.6 ± 2.3          | 150.0 ± 2.1           | 107.9 ± 12.8                       | 88.1-150.0 | 83                              | 11.9                          | < 0.001                |
|                             | 2013  | 104.7 ± 2.4          | 149.7 ± 1.5           | 108.5 ± 11.7                       | 86.4-151.3 | 85                              | 10.8                          | < 0.0001               |

SD: Standard Deviation
